# Supplementary material for: Dectin-1 stimulation promotes a distinct inflammatory signature in the setting of HIV-infection and aging
Source: Aging (Albany NY). 2023 Aug 21;15(16):7866–908. doi: 10.18632/aging.204927 (PMC10497004; doi:10.18632/aging.204927)
Supplement: Supplementary Table 5 [file aging-15-204927-s004.xlsx]

## Sheet: All_Venn
Supplementary Table 5. Table of differentially expressed genes and shared genes among cohorts.
Associated table for Supplementary Figure 12 (Venn diagram of Differentially Expressed Genes and Shared Genes amongst cohorts).
Names	total	elements
HIV-Older HIV-Young Older* Young**	49	NMB
		KBTBD8
		RGS16
		DUSP4
		TNFSF15
		AC034199.1
		SPRY2
		SERPINB2
		TNF
		IL1A
		HCAR2
		AL121899.1
		ACSL5
		AREG
		NR4A3
		SOCS3
		BCL2A1
		RGS1
		FERMT2
		SLCO4A1
		F2RL2
		LONRF3
		INHBA
		GADD45A
		SLC7A5
		NR4A1
		CTSL
		PHLDA2
		NRIP3
		PURB
		AC016831.6
		LINC01705
		MEI1
		UPP1
		CDCP1
		IL1B
		F3
		HES4
		BCAT1
		MMP19
		GEM
		TM4SF19
		TFPI2
		AC003092.1
		TNFSF14
		PLAUR
		CISH
		FOSL1
		PNP
HIV-Young Older* Young**	189	ESPL1
		CASS4
		CCNA1
		PLAU
		MATK
		GDF15
		COL22A1
		MMP7
		TRIB3
		TMCC3
		MIR4435-2HG
		RHOF
		SH3RF3
		SORL1
		ABL2
		TGM2
		CDK20
		TIMP3
		ATF3
		CD1A
		RHOC
		SSTR2
		XIRP1
		HBEGF
		CHST15
		CSF1
		SLC2A3
		JAKMIP2
		ATP13A3
		IL24
		NPR1
		RHBDF1
		SLAMF1
		TMEM217
		PHLDA1
		PIGR
		PINLYP
		STRIP2
		COL7A1
		TMEM44
		SMAGP
		PCSK6
		DCSTAMP
		IL36B
		LINC02458
		ELOVL7
		SORCS2
		ITGB7
		EMP1
		ECE1
		ASPH
		RAB38
		HECW2
		SNAI1
		CYP19A1
		SLC9A7
		MFSD2A
		FURIN
		EGR2
		METTL7B
		RABGEF1
		CD226
		SYNJ2
		SPP1
		AL158166.2
		PTGS2
		DUSP1
		NFKBID
		PPFIBP1
		RGCC
		PNPLA1
		NT5E
		EBF1
		CCND1
		FLNB
		MSR1
		KDM6B
		HTRA3
		AL138899.1
		TRIB1
		LINC02244
		ASPHD1
		TRIM9
		AC079209.1
		MIR222HG
		ITGA2
		MME
		GREM1
		ARRDC4
		GAL
		TNFRSF12A
		EGR3
		MMP1
		DOT1L
		ABI3
		PTPN7
		CD109
		HSD3B7
		CLDN12
		GPR155
		IL19
		GPC4
		DBP
		CD1B
		STARD8
		FLT1
		TMEM45B
		DYRK3
		LINC01050
		PECAM1
		AF064858.1
		LPAR3
		CD276
		FAM83G
		SYT6
		FYB1
		JAML
		AC078850.1
		MYEOV
		IL3RA
		AC005280.2
		HOMER1
		PDLIM4
		PDGFA
		CCL3L1
		MICAL2
		PAQR5
		CYTOR
		MAPK13
		HRH1
		MIR155HG
		BHLHE40
		FLRT2
		AC007384.1
		METTL7A
		SCML1
		LRP12
		IL1RN
		MFSD12
		RUSC2
		TFPI
		SERPINE1
		IL36RN
		IRGQ
		RARG
		DPEP2
		DNAJB5
		TM4SF1
		AC131097.4
		CTNNAL1
		PDCD1
		CDKN1A
		LPL
		FCER2
		STAC
		NFXL1
		LINC01010
		PCDHGC3
		FOSB
		OCSTAMP
		HIVEP3
		ITGB3
		BX640514.2
		TM4SF19-TCTEX1D2
		CD101
		TREM1
		AL390036.1
		CCL3
		CYBRD1
		MLPH
		MMP10
		KCNN4
		MAP2K3
		ITPRIP
		SCG5
		MAFF
		TNFRSF10D
		SLC18B1
		GPAT3
		DPYSL3
		RUBCNL
		SCARF1
		MAMLD1
		S1PR3
		SPOCD1
		MYADM
		CSF2
		MOB3B
		STEAP1
HIV-Older HIV-Young Young**	12	B3GNT5
		SPINK1
		OTULINL
		NIPAL4
		FABP3
		MSANTD3
		CREM
		FNIP2
		RHOBTB3
		LY9
		TRIM16L
		MMP9
HIV-Older Older* Young**	7	EGR1
		IER3
		CCL20
		OSM
		HIF1A-AS2
		CXCL2
		TAGLN3
HIV-Older HIV-Young Older*	3	CXCL8
		FCGR3A
		MDGA1
HIV-Young Young**	228	MMP2
		SMARCD3
		APBB2
		CXCR4
		ADD3
		SLC28A3
		SIRPB2
		CCDC28B
		FGR
		CD4
		MET
		SNHG4
		SPN
		AC024597.1
		ALOX5
		NRP1
		GPR3
		SERPINF1
		CSF3R
		FCGR2B
		TMEM86A
		MCUB
		RAC2
		HES1
		UCHL1
		MPP7
		ADGRE3
		HS3ST1
		GIMAP1
		NPAS1
		ALDH2
		FABP5
		CARMIL1
		TPCN1
		PGGHG
		FCN1
		SLC12A6
		SLC9A9
		ANKRD28
		RCSD1
		RAI14
		TMEM273
		PPBP
		LIF
		SDC2
		ETS2
		HAL
		IL6R
		PPARG
		NUPR1
		MMP2-AS1
		AHI1
		TIAM1
		PERP
		FN1
		VSIR
		SERTAD2
		NEK6
		NKG7
		IFITM2
		ACSF2
		KLRC1
		HRH2
		PDGFRB
		NDRG2
		ADCY3
		TIFAB
		KLHDC8B
		IL23A
		NEDD4L
		SLA
		CCR2
		ERCC1
		LXN
		SMOX
		TLR8
		NAB2
		ACRBP
		RAB20
		SPAG9
		PHGDH
		ENO2
		GLIPR2
		SPRED1
		TCF19
		IL21R
		TLR5
		TGM3
		BAG3
		CTSK
		CD93
		SEMA7A
		TIE1
		TCTEX1D2
		TMOD2
		FLI1
		IL1RAP
		TSPYL5
		KCNJ10
		SLC26A11
		IL36G
		GIMAP6
		ARAP3
		NUMBL
		FCMR
		RAB7B
		S100A8
		MRC1
		SLC11A1
		AUH
		WWP1
		ST6GALNAC3
		ADA
		ASGR1
		FAM131A
		CHAC1
		GAPT
		CREB5
		WFS1
		CD14
		PPARD
		IRF4
		ITGAM
		SDS
		BLNK
		FASLG
		ASGR2
		COL4A2
		C1S
		BMF
		P4HA2
		TSPAN15
		PDE2A
		LSP1
		STX1A
		DUSP6
		GFOD1
		MAPK6
		DNASE2
		TSKU
		TLE3
		ANKH
		GZMA
		LY75
		GALNT6
		ADAM28
		GIMAP7
		MSRB2
		SLAMF9
		SH3BP5
		SDC1
		TLR7
		SLC1A4
		HPCAL1
		PSAT1
		CLDN14
		NEU4
		IARS
		FAIM
		STRBP
		ZFYVE28
		JARID2
		SPINT1
		TXNRD1
		TNFRSF21
		CD300LB
		C11orf45
		SGMS2
		AC017002.1
		TGFA
		SIGLEC10
		PADI2
		P2RX1
		IFNLR1
		GNG11
		ITGAX
		NABP1
		RUNX2
		OLFML2B
		ADORA2B
		RRP12
		CLEC12A
		THRA
		LINC02345
		JUP
		FAM124A
		PTGFRN
		AKR1C1
		SLC38A1
		KIAA0319
		RARRES1
		NRCAM
		CCND2
		FCGR1A
		CTPS2
		PAPLN
		FZD6
		GTF2IRD1
		HPSE
		NHSL2
		TDO2
		KITLG
		DOCK3
		TMEM119
		ACTN1
		TIMP4
		PITPNC1
		KLF10
		LOXHD1
		PIK3R6
		ELK3
		TMSB4X
		CD300E
		JUN
		APBB1IP
		TRIB2
		INSIG1
		GGT5
		AC100802.1
		2023-03-01
		SATB1
		YPEL3
		SCN9A
		ANXA11
		SLC16A10
		CEACAM3
		LTA4H
		CD1C
Older* Young**	20	CXCL3
		NR4A2
		CCL4L2
		CCL7
		STEAP4
		CPVL
		CHN2
		RASAL2-AS1
		RFX8
		IL6
		DOCK6
		AC055720.1
		TNFSF8
		ABCB4
		FUCA1
		HBB
		GIPC3
		HMGA1
		MTMR11
		C1orf162
HIV-Older Young**	8	CDC42EP3
		MYO10
		KCNMB1
		DDIT4L
		DDIT4
		SOWAHC
		SLC46A3
		NR1D1
HIV-Young Older*	22	NFIA
		ANO5
		SERPING1
		DUSP5
		BATF3
		ASAP2
		AC064805.1
		C22orf42
		SECTM1
		AC100849.1
		G0S2
		PHLDB1
		ABCG2
		KLF7
		KREMEN1
		AQP3
		DDIT3
		AL355512.1
		TTYH2
		SHOX2
		RBM43
		ZNF697
HIV-Older HIV-Young	3	CMPK2
		TFRC
		CKS2
HIV-Older Older*	6	LINC00520
		SLC12A8
		TSC22D1
		ARL5B
		PDK4
		CD274
Young**	130	MEF2D
		NCF4
		TRAF3IP2
		NDST1
		FRY
		EPS8
		RXRA
		LAIR1
		COL15A1
		STEAP3
		EMILIN1
		TTYH3
		DUSP2
		SYPL2
		HVCN1
		PAQR8
		ZNF318
		TKTL1
		CD300A
		FCGR1B
		CYP4F3
		ECM1
		STON2
		LINC01465
		TGM5
		THBD
		OXCT1
		TBX21
		RRAD
		C5
		BEX2
		AGO2
		CERKL
		NAIP
		RTN4RL2
		MAP7
		PLAC9
		NAV2
		TBKBP1
		VWF
		FAM129B
		GALM
		PRF1
		NDFIP2
		IBA57
		ADGRE2
		ADRB2
		FCRLB
		FAM89A
		GLI3
		AIF1
		TREML2
		CPED1
		LTB4R
		LINC00504
		SLC25A25
		CD302
		SIGLEC15
		TNC
		TPRG1
		F13A1
		SLC2A14
		ZNF365
		C17orf58
		GPR183
		RTN2
		TXK
		GPSM1
		ALOX5AP
		C19orf71
		CAPN2
		NLRP2
		GPBAR1
		ZNF69
		ERP27
		SOWAHD
		ULBP2
		ALDH1A1
		ADORA3
		FANCI
		IQSEC1
		LINC01094
		SNRPN
		SHB
		C5orf30
		GAL3ST4
		CCL1
		KCNK13
		EID3
		C1QB
		SLC29A1
		ST14
		CRMP1
		ODC1
		SDC3
		ARID3B
		CD3G
		CD209
		ARG2
		RGS12
		PCDHGA11
		IFNGR1
		AC144652.1
		RASAL2
		DAGLA
		SLC7A1
		CXCL5
		LYZ
		GATA2
		ZMIZ1
		TCTEX1D1
		STAMBPL1
		SPRY4
		ORC6
		TMEM131L
		DMWD
		ZNF823
		EPAS1
		FAM131B
		SUCNR1
		RFLNB
		CLCF1
		DTNA
		IL1R1
		CTTN
		INPP5A
		ICAM5
		TMEM176B
		KBTBD7
		HOPX
HIV-Young	354	SAMD4A
		TNIP3
		MEFV
		GLT1D1
		SLC22A18AS
		AEN
		LINC02319
		FGL2
		CEP70
		C1R
		SIDT1
		S100P
		ZEB1
		SLC38A5
		UCN
		MIR181A1HG
		FGFR1
		FXYD6
		GIMAP8
		TRIM22
		MIR6124
		RPS6KA5
		DHRS11
		AKAP7
		ACSM3
		HCST
		CYP2U1
		SLC8A1
		ANLN
		ELOVL3
		AL392172.1
		DDB2
		C16orf45
		KIAA1958
		CCL19
		SLFN12
		CD38
		TMIGD3
		ATP1B1
		GMPR
		EMP2
		FAS
		UBA7
		GSDMA
		TNFSF10
		RARRES3
		THBS3
		SORT1
		PPM1K
		FZD2
		HESX1
		SLC40A1
		AC092375.2
		TMEM117
		MAGI3
		LINC02257
		LINC02361
		FAT2
		KLHDC7B
		LRRK2
		ZNF467
		LAG3
		NOTUM
		GPR171
		SEZ6
		SLC22A16
		DHRS13
		SH3RF3-AS1
		LYSMD2
		CXCL11
		ANKS6
		BCL9L
		ADAMTS2
		OLFM1
		TCF4
		CIP2A
		MCEMP1
		C1orf21
		AC015819.2
		ATP1A1
		PIM1
		CYSTM1
		MYBPH
		LTBP2
		DISC1
		CLTCL1
		LAMB3
		USP13
		CAMKK1
		OAS3
		SYTL4
		ZNF107
		LIMA1
		ITSN1
		OAS1
		SVIL
		NOXA1
		LILRA2
		AL137145.2
		MRTO4
		APBA2
		AL135818.2
		PLEKHG3
		SCRN1
		DUSP14
		RNF19B
		LGALS3BP
		HLA-DOA
		SAMD9L
		CSF3
		CD207
		HELZ2
		PARAL1
		LINC01160
		ETV7
		HERC6
		AKAP2
		XAF1
		ST3GAL6
		SPIN4
		ZBED6CL
		TNK2
		ACOD1
		FAM49A
		NCF1
		MAP4K3
		XXYLT1
		GPR33
		REPS2
		GBP2
		SIGLEC1
		ATP1B2
		SULF2
		NEURL3
		USP18
		LINC00324
		OLIG1
		AC243960.3
		MC1R
		CDCA7
		USP2
		MELK
		CLMN
		IQCD
		EPSTI1
		KCNMB3
		TRANK1
		CD72
		ZNF480
		PDZD7
		TRIM14
		SNX20
		TNFRSF8
		PTGIR
		SERPINF2
		S100A16
		C12orf57
		ZBP1
		L3MBTL4-AS1
		POLQ
		KRT78
		TXNDC16
		ZBTB4
		ATF4
		VPS37B
		OASL
		GBP4
		PRR11
		FUT8
		C16orf86
		IL27
		STAT1
		TLR3
		SNAI3
		GALNT4
		CARD16
		AC079949.1
		TRIM6
		CTTNBP2
		SMURF2
		ISG15
		MVB12B
		FGD2
		MX2
		ELOC
		ZNF33B
		TMEM268
		GRIN3A
		ZNF618
		RIN1
		C9orf106
		INSL6
		CD163
		EIF2AK2
		ACSS1
		DNM3
		PDGFRL
		AC009075.1
		GAREM1
		EIF4E
		CPLANE1
		ITGB1BP1
		PML
		BATF2
		IFITM3
		CNR2
		CDC14B
		KCNJ1
		PRAG1
		SP110
		KIAA0513
		APBB3
		LINC00346
		TMEM236
		CYTL1
		NBEA
		ZC3H12D
		PLA2G2D
		IGFBP6
		IFI44L
		ST20
		OSBPL7
		CCL8
		LRRC49
		TUBB6
		AF064858.3
		NFE2L3
		EML4
		OAS2
		MDK
		CD52
		TOP2A
		TACSTD2
		PARP10
		CXCL9
		JADE2
		VAMP5
		NMNAT3
		MAPK3
		NAV1
		ZDHHC23
		BMP1
		SMPD3
		CLEC17A
		BCAS1
		HYLS1
		BTN3A3
		KRT18
		HSH2D
		ZBTB10
		DCAF13
		LRMP
		AC104389.4
		ZNF280B
		RTP4
		NUMB
		SLC46A1
		WDR76
		NADK
		AC079949.2
		STK32B
		AZIN2
		CBLN3
		HERC5
		ARC
		NHS
		FFAR2
		LRRC3
		CD1E
		MAP1LC3A
		MX1
		MPP3
		ARHGEF6
		PLPP3
		C3orf58
		VASP
		LINC00487
		NBL1
		TMEM229B
		TCF7L2
		LY6E
		ZNF660
		MMP25
		NREP
		FABP4
		LRG1
		CFB
		DDX58
		HAPLN3
		ACACB
		STXBP1
		ABCA7
		SYT17
		MPEG1
		FOXP1
		IMPDH1
		GIMAP5
		SPACA9
		PNPLA7
		IFIH1
		SNX8
		NUAK2
		GPX3
		L3MBTL3
		AIM2
		SLFN5
		FCRLA
		UST
		ADAMTS10
		PDCD1LG2
		NIPAL1
		SIAE
		SAMD9
		LRRC27
		FAM117B
		FKBP9
		CFP
		NOD2
		MAP4K4
		IGFBP4
		SLIT2
		GBP5
		PDE1B
		MYOZ1
		ODF3B
		PDK3
		IFITM1
		ACOX2
		PARP9
		MIR4799
		LGR4
		TENT5A
		C20orf96
		APOL3
		DAPK1
		PROCR
		NPC1
		HGF
		ATP8B1
		IL7
		TRMT5
		GPC1
		IFI44
		MS4A14
		ABLIM1
		YPEL2
		ZNF445
		PSD3
		AL355338.1
		IFIT3
		ADGRE1
		OSBPL5
		PIK3IP1
		ANKRD37
Older*	106	EDN1
		ERG
		SOX4
		CCL22
		FAM129A
		RPGRIP1
		LINC01336
		PLK3
		FMO4
		AC091173.1
		AL161785.1
		CD40
		SMAD9
		AL390760.1
		POU6F1
		HIST1H2AL
		DCUN1D3
		CORO2B
		AKR1C2
		HCAR3
		MIR3945HG
		MNDA
		KIF14
		LINC01114
		TNFRSF4
		PCDHGB4
		STC1
		LINC01629
		SDC4
		HIST1H2BB
		TNFAIP8L3
		PDE6H
		TRPA1
		ITPR1
		MIDN
		CD83
		IMPA2
		CCL4
		RUNDC3B
		EREG
		AL590648.3
		PIM3
		ASRGL1
		MAS1
		CSRNP1
		PHF24
		AC010536.1
		SERPIND1
		SHMT1
		KCNQ1
		DHRS9
		OR8G5
		LINGO3
		PROC
		CDK18
		RGS2
		AC113418.1
		PPP1R15A
		DENND2C
		NAMPT
		IRAK2
		CD80
		AC091808.1
		CYP27B1
		AK4
		FFAR4
		RASGEF1B
		FSCN1
		MCOLN3
		CEMIP
		FEZ1
		METRNL
		AL365434.2
		STARD4
		DGAT2
		HELLS
		FCGR3B
		TRAF1
		GCNT4
		CDKN1C
		MBLAC2
		IL7R
		DEPTOR
		FGFBP2
		DDX60L
		F5
		P2RX4
		ADRB3
		SH3RF1
		TIGD3
		HSD11B1
		CX3CR1
		CCIN
		KCNMB4
		GPA33
		DENND6B
		LPAR1
		KRT79
		EPHB2
		AC093673.2
		PPP1R3G
		HORMAD1
		WHRN
		HTRA4
		HBA2
		MEF2C
HIV-Older	68	C15orf48
		SLCO2B1
		NPM1
		SNAPC1
		NRP2
		RNF144A
		SNX10
		RIPK2
		LITAF
		PHACTR1
		ANKRD52
		SNN
		GP6
		BX640514.1
		P2RY2
		GPRC5A
		DRAM1
		PCID2
		SMS
		CCDC85B
		GCH1
		NFATC3
		TRIP10
		RPF2
		GADD45B
		OPN1SW
		CRADD
		PLCXD1
		SGPP2
		LINC00536
		CD59
		DGKG
		STK36
		TEP1
		KAT14
		HSPA9
		TMEM251
		SLC20A1
		AC105177.1
		GZMB
		UXS1
		CD48
		ST3GAL4
		SLAMF7
		PDE4B
		GPR84
		C2CD2
		UBTD2
		LCP2
		RNASE1
		DTL
		RSAD2
		ATP6V0D2
		SLC35F2
		SEMA4A
		RGS17
		NBPF9
		TXN
		ANKRD1
		MOAP1
		TNFSF9
		L1TD1
		STX6
		CHAC2
		TSHR
		MT2A
		MIGA2
		MCTP1

## Sheet: 49_common
Genes
NMB
KBTBD8
RGS16
DUSP4
TNFSF15
AC034199.1
SPRY2
SERPINB2
TNF
IL1A
HCAR2
AL121899.1
ACSL5
AREG
NR4A3
SOCS3
BCL2A1
RGS1
FERMT2
SLCO4A1
F2RL2
LONRF3
INHBA
GADD45A
SLC7A5
NR4A1
CTSL
PHLDA2
NRIP3
PURB
AC016831.6
LINC01705
MEI1
UPP1
CDCP1
IL1B
F3
HES4
BCAT1
MMP19
GEM
TM4SF19
TFPI2
AC003092.1
TNFSF14
PLAUR
CISH
FOSL1
PNP

## Sheet: 43_Young  
Genes	Fold_change
LINC00504	5.18891
THBD	4.19786
RRAD	3.75705
TKTL1	3.75667
GLI3	3.58333
SYPL2	2.93735
GATA2	2.88884
SUCNR1	2.67889
ODC1	2.32674
CCL1	2.26319
SDC3	2.10201
SIGLEC15	2.05195
FCRLB	1.91917
C17orf58	1.86412
STON2	1.83077
ST14	1.81752
DMWD	1.79448
KCNK13	1.72314
LTB4R	1.64982
PCDHGA11	1.64614
AC144652.1	1.60348
COL15A1	1.59512
CD300A	1.50222
RFLNB	1.48068
SLC2A14	1.44422
NDFIP2	1.41447
ADRB2	1.41011
BEX2	1.35623
ALOX5AP	1.35169
LINC01465	1.27841
IBA57	1.24799
GALM	-1.21827
FANCI	-1.22523
CERKL	-1.28023
FRY	-1.33393
PRF1	-1.39923
ALDH1A1	-1.4512
ARG2	-1.54536
GPBAR1	-2.36691
CD209	1.67618
CXCL5	1.26726
IL1R1	1.2072
TBX21	1.80001

## Sheet: 91_Young_co-morbid
Genes	Fold_change
TNC	4.791745946
RTN4RL2	4.65692287
TCTEX1D1	3.902112105
CRMP1	3.429715775
TREML2	2.737498321
PLAC9	2.69573128
EMILIN1	2.286025726
SPRY4	2.284039725
ICAM5	2.24477556
ULBP2	2.208960472
FAM131B	2.203117385
ZNF365	2.133533705
SHB	2.057655773
VWF	2.052515606
FAM129B	1.883640561
NLRP2	1.819784691
INPP5A	1.7481524
C19orf71	1.707246837
SLC7A1	1.682016376
CLCF1	1.639024551
DAGLA	1.576262091							e
TPRG1	1.561104613
AGO2	1.520127836
NAV2	1.51831665
MAP7	1.503197267
ECM1	1.440382773
EPAS1	1.429739691
EID3	1.397692261
RTN2	1.395282198
CAPN2	1.377880569
EPS8	1.360104761
GPSM1	1.356253273
NDST1	1.355846622
TRAF3IP2	1.342901306
ZNF318	1.336319005
SLC25A25	1.327285995
IQSEC1	1.282999392
ARID3B	1.26830787
MEF2D	1.268232927
ZMIZ1	1.268117703
CYP4F3	1.266086024
RASAL2	1.261697689
DTNA	1.261338734
FAM89A	1.24790703
CTTN	1.233509605
DUSP2	1.21684968
ADGRE2	1.204939678
TTYH3	1.204428339
TBKBP1	1.203362038
RXRA	1.200846127
LAIR1	-1.202304376
C5orf30	-1.231288374
STEAP3	-1.235821345
SNRPN	-1.238309016
TMEM176B	-1.247427922
C1QB	-1.247686597
OXCT1	-1.248117571
SOWAHD	-1.282271915
ZNF69	-1.290125455
KBTBD7	-1.298844534
RGS12	-1.306213666
STAMBPL1	-1.312667079
HVCN1	-1.313566086
ZNF823	-1.319239107
ORC6	-1.328936091
AIF1	-1.333759582
TXK	-1.34033554
IFNGR1	-1.352076562
NCF4	-1.354731229
HOPX	-1.356313595
C5	-1.363857467
NAIP	-1.369303434
CD302	-1.413516921
CPED1	-1.423705322
PAQR8	-1.450683111
ERP27	-1.452491747
TMEM131L	-1.478483165
CD3G	-1.538184308
GPR183	-1.644443696
LYZ	-1.786006215
SLC29A1	-1.811303876
LINC01094	-1.98934379
TGM5	-3.434966117
FCGR1B	-3.986505836
GAL3ST4	-4.041189209
ADORA3	-4.197911462
F13A1	-4.234865443
CD209	1.48765
CXCL5	2.44054
IL1R1	1.69722
TBX21	1.35429

## Sheet: 106_Old_co-morbid
Genes	Fold_change
OR8G5	6.10692
AC113418.1	5.28572
ERG	4.40089
AC093673.2	3.48539
STC1	3.44637
CORO2B	3.28826
CCL4	3.19807
CCIN	3.17696
ADRB3	3.08884
KIF14	3.0753
GCNT4	2.68789
TNFAIP8L3	2.61181
AL365434.2	2.52612
SERPIND1	2.51416
MAS1	2.42066
EDN1	2.40174
MCOLN3	2.39728
KRT79	2.357
CSRNP1	2.30586
CDK18	2.22333
CCL22	2.22249
LINC01336	2.19987
F5	2.17917
AKR1C2	2.15855
AL590648.3	2.14266
AC091173.1	2.10748
CEMIP	2.01849
AC010536.1	2.00272
LINC01629	1.98074
TRAF1	1.97152
FSCN1	1.91273
PHF24	1.89062
MIR3945HG	1.85983
AC091808.1	1.83442
IRAK2	1.83179
DENND2C	1.82598
TRPA1	1.71042
HSD11B1	1.66396
WHRN	1.65316
METRNL	1.63771
TNFRSF4	1.59667
SDC4	1.58231
PIM3	1.57225
IL7R	1.57225
CD83	1.57014
STARD4	1.55451
HCAR3	1.51071
EREG	1.4983
PLK3	1.47518
AL390760.1	1.40047
CD80	1.40006
NAMPT	1.39263
SH3RF1	1.36846
HTRA4	1.36361
DDX60L	1.34724
FEZ1	1.34363
FAM129A	1.33344
PPP1R15A	1.3232
CYP27B1	1.31797
CD40	1.29131
AK4	1.27889
P2RX4	1.25805
ITPR1	1.24304
MIDN	1.23921
DGAT2	1.22594
POU6F1	1.22395
LPAR1	1.21364
DCUN1D3	1.20245
RASGEF1B	1.20072
SOX4	-1.20891
HIST1H2AL	-1.21275
CX3CR1	-1.2339
IMPA2	-1.25046
MEF2C	-1.2837
FCGR3B	-1.2847
CDKN1C	-1.31402
FGFBP2	-1.32494
FMO4	-1.36372
MBLAC2	-1.38703
HELLS	-1.42496
SHMT1	-1.48064
DENND6B	-1.50102
PPP1R3G	-1.52189
GPA33	-1.54417
PDE6H	-1.55671
DHRS9	-1.61362
MNDA	-1.65402
SMAD9	-1.68548
LINGO3	-1.68721
ASRGL1	-1.70035
KCNQ1	-1.741
RGS2	-1.74461
AL161785.1	-1.78969
HBA2	-1.80966
RPGRIP1	-1.835
KCNMB4	-1.89906
LINC01114	-1.9469
RUNDC3B	-1.99998
EPHB2	-2.00666
TIGD3	-2.00828
FFAR4	-2.06794
HIST1H2BB	-2.12665
PROC	-2.18597
HORMAD1	-2.28407
DEPTOR	-2.6475
PCDHGB4	-3.71478

## Sheet: 354-HIV-Young
Genes	Fold_change
CD207	4.596070259
S100A16	4.290495812
CSF3	4.04025826
AC079949.1	3.936388669
KRT18	3.886036146
IGFBP6	3.870370824
TACSTD2	3.56631143
CYTL1	3.549719615
ARC	3.468273149
AC079949.2	3.269123245
MYOZ1	3.261216446
KRT78	3.21758618
LINC02257	3.115861561
SH3RF3-AS1	3.08555082
ATP1B2	3.012385476
GPC1	2.849629526
PRAG1	2.798230312
AL135818.2	2.723791412
NIPAL1	2.708852391
PARAL1	2.669534017
SLC22A18AS	2.576181193
ST20	2.423045294
MYBPH	2.393309349
CD52	2.269070967
AC015819.2	2.259929868
ABLIM1	2.180003628
FCRLA	2.178130562
MCEMP1	2.164237672
KCNJ1	2.135101228
USP2	2.047060478
AF064858.3	1.936781657
AC009075.1	1.91829238
GPX3	1.854934967
LILRA2	1.835063093
ATP1B1	1.833654876
CEP70	1.775992143
MIR6124	1.769948153
SULF2	1.745073477
PLPP3	1.732775583
TMEM236	1.725417558
S100P	1.709118975
ACOX2	1.698796742
CLEC17A	1.681123693
CAMKK1	1.616392576
SNAI3	1.609641101
HCST	1.608196731
ZEB1	1.599388012
MRTO4	1.55667025
TCF7L2	1.556059063
LINC01160	1.554742006
AC092375.2	1.528120281
MIR4799	1.513136456
ITGB1BP1	1.494300678
PSD3	1.455258983
FGFR1	1.451716524
MC1R	1.445929323
MAP4K3	1.443483687
FABP4	1.428983363
AL392172.1	1.427314778
C16orf45	1.420999098
BMP1	1.418064155
PIM1	1.41245186
CD1E	1.393793562
DHRS11	1.38783435
GALNT4	1.380384915
LIMA1	1.365882934
DCAF13	1.36554712
AEN	1.364992985
SLC22A16	1.359559921
EML4	1.357306891
CYSTM1	1.353157912
NPC1	1.353006152
STK32B	1.351849325
ST3GAL6	1.345684623
SPIN4	1.338281395
ELOC	1.336985692
STXBP1	1.333130888
UST	1.32426079
DUSP14	1.315374325
ANKRD37	1.313537016
TRMT5	1.302201694
MAP4K4	1.299688092
L3MBTL4-AS1	1.296017511
AKAP2	1.295966405
SVIL	1.295175352
LAMB3	1.287825577
SORT1	1.286973982
VPS37B	1.284482429
PROCR	1.28248559
TNIP3	1.275292003
TMEM117	1.272408711
PDE1B	1.264654487
TUBB6	1.252232538
ATF4	1.236796503
AL355338.1	1.235822812
ATP1A1	1.232712625
SNX8	1.229382022
AC243960.3	1.220695261
LRG1	1.21424727
VASP	1.212391059
C12orf57	1.210079337
EIF4E	1.205937745
NUMB	1.202568793
LINC00346	1.201077694
FGL2	-1.201070409
OLIG1	-1.201168673
IFI44L	-1.201720456
GIMAP8	-1.202990138
ZNF445	-1.207116605
GLT1D1	-1.217233354
AC104389.4	-1.218851979
ZBTB10	-1.221993856
APBA2	-1.222402122
NADK	-1.224542956
OSBPL7	-1.225794287
THBS3	-1.22743889
VAMP5	-1.228564804
SMURF2	-1.232387252
LRRC3	-1.237517269
ZNF660	-1.23768319
FAM117B	-1.239429001
FKBP9	-1.240625695
PDK3	-1.24110212
RNF19B	-1.241183032
SAMD9	-1.242296145
IL7	-1.245151963
OAS3	-1.24768113
RARRES3	-1.247745934
MEFV	-1.248771043
ARHGEF6	-1.248778603
CARD16	-1.252494806
GPR171	-1.252627058
SAMD9L	-1.255397701
SLFN5	-1.257222652
CPLANE1	-1.257269311
LRRK2	-1.258940327
KIAA1958	-1.259640652
SERPINF2	-1.261520991
ZBED6CL	-1.263553012
DNM3	-1.268581972
ACOD1	-1.268975332
TNFRSF8	-1.269412956
BATF2	-1.273624999
C16orf86	-1.273882027
EIF2AK2	-1.2771541
FUT8	-1.279288155
HLA-DOA	-1.282380285
PRR11	-1.284090703
CFP	-1.286089608
PARP10	-1.290680409
DAPK1	-1.292861956
IMPDH1	-1.293151065
NUAK2	-1.297491944
PDCD1LG2	-1.302907058
ZNF480	-1.309274879
NBL1	-1.309998707
NCF1	-1.310754261
SCRN1	-1.312265459
HERC6	-1.313453374
TMEM229B	-1.316150484
XXYLT1	-1.316175476
LRRC27	-1.318989831
BTN3A3	-1.32117264
NFE2L3	-1.326602367
XAF1	-1.328262289
PARP9	-1.329844218
ZNF107	-1.330868863
ZBTB4	-1.33116822
RIN1	-1.332522369
C3orf58	-1.333740464
OAS2	-1.335819593
KIAA0513	-1.336398914
STAT1	-1.339404663
HYLS1	-1.339962558
ACACB	-1.342378037
C20orf96	-1.347096462
FOXP1	-1.351163745
FAM49A	-1.35295653
NAV1	-1.353327734
SLIT2	-1.357969189
IFIH1	-1.36052371
BCAS1	-1.36099519
CFB	-1.365114414
ADAMTS2	-1.365378782
LRRC49	-1.367158197
ANKS6	-1.3715663
ITSN1	-1.373861299
LINC00324	-1.378250289
APBB3	-1.379329712
APOL3	-1.380195691
CIP2A	-1.381281431
GIMAP5	-1.383867125
GBP2	-1.385538723
PTGIR	-1.387224209
IL27	-1.388439643
WDR76	-1.39056687
PPM1K	-1.391623175
PDZD7	-1.399670747
PIK3IP1	-1.405282738
MMP25	-1.408018008
DDX58	-1.414450143
SYT17	-1.414590449
SLC8A1	-1.415046149
AKAP7	-1.415280604
OASL	-1.415567605
C9orf106	-1.417218327
DDB2	-1.417992779
UBA7	-1.423625846
TXNDC16	-1.426190621
SIAE	-1.440306893
SAMD4A	-1.446967544
DHRS13	-1.450008861
RTP4	-1.451644932
LYSMD2	-1.451772369
PML	-1.451827795
MX2	-1.452795884
MAPK3	-1.453193857
RPS6KA5	-1.455829392
CLMN	-1.462653569
MS4A14	-1.466826468
SLFN12	-1.467097485
PLEKHG3	-1.467961238
ABCA7	-1.470352307
ATP8B1	-1.471472035
HAPLN3	-1.471887891
MDK	-1.474930453
HELZ2	-1.478603092
LINC02319	-1.487972804
BCL9L	-1.498498499
NHS	-1.498805044
SIDT1	-1.509733917
CLTCL1	-1.512436875
ACSS1	-1.514365762
ZNF280B	-1.518390226
HGF	-1.519367272
NMNAT3	-1.520231266
ANLN	-1.538499363
TRANK1	-1.542213603
ISG15	-1.543215756
PNPLA7	-1.544976646
LGALS3BP	-1.545760499
C1orf21	-1.546048003
SP110	-1.558917768
NBEA	-1.559540931
ACSM3	-1.5626444
MAGI3	-1.56563364
ODF3B	-1.567181465
TENT5A	-1.572361429
TMEM268	-1.573465531
CXCL9	-1.580609661
TCF4	-1.582557763
MIR181A1HG	-1.590450487
CXCL11	-1.591625447
AIM2	-1.593712404
TNK2	-1.594848402
LY6E	-1.596333122
SIGLEC1	-1.597475722
IFIT3	-1.61511503
FAS	-1.616741023
ZNF467	-1.621851912
NOXA1	-1.624219686
MX1	-1.62705293
TRIM22	-1.645699933
INSL6	-1.646488179
KCNMB3	-1.653057115
USP18	-1.663761243
LTBP2	-1.668878724
MPEG1	-1.671881974
JADE2	-1.677553868
EPSTI1	-1.68054991
MELK	-1.6937884
TRIM14	-1.702196561
TRIM6	-1.702619325
SLC40A1	-1.706765995
GSDMA	-1.709375871
L3MBTL3	-1.713656826
SLC38A5	-1.718848737
FXYD6	-1.723268491
FGD2	-1.727487315
DISC1	-1.736839845
AZIN2	-1.739835644
IFI44	-1.740077616
ADAMTS10	-1.743859865
IFITM3	-1.749538829
OAS1	-1.753513015
CCL19	-1.755920749
MVB12B	-1.762389442
OLFM1	-1.775413078
SEZ6	-1.783630183
HSH2D	-1.787050481
GBP5	-1.789538809
HERC5	-1.804379061
UCN	-1.807936759
YPEL2	-1.818648841
EMP2	-1.819734204
CBLN3	-1.823186061
KLHDC7B	-1.824500274
IFITM1	-1.825823461
FAT2	-1.826958789
LRMP	-1.828166991
USP13	-1.828437688
MAP1LC3A	-1.836713129
SNX20	-1.840793203
ETV7	-1.86225963
CD72	-1.870578458
OSBPL5	-1.886333168
TOP2A	-1.889812965
GBP4	-1.894042342
POLQ	-1.915181398
LINC02361	-1.923906345
ELOVL3	-1.972792512
FZD2	-1.980336518
SPACA9	-2.022594501
FFAR2	-2.023216646
CD163	-2.029105111
NEURL3	-2.049747389
ZNF618	-2.054911156
NREP	-2.059748607
CCL8	-2.079490463
ZC3H12D	-2.094512348
HESX1	-2.110706035
SMPD3	-2.126425557
GRIN3A	-2.130955614
NOD2	-2.131628438
LAG3	-2.159501943
GPR33	-2.194205334
ZBP1	-2.235113208
SYTL4	-2.237081291
CDC14B	-2.282351072
CD38	-2.291751371
C1R	-2.300328001
CNR2	-2.32734415
ADGRE1	-2.381015457
PLA2G2D	-2.428890372
PDGFRL	-2.447091992
TNFSF10	-2.504684286
ZNF33B	-2.525360872
TLR3	-2.531472316
TMIGD3	-2.535245443
GAREM1	-2.593344441
ZDHHC23	-2.64861849
AL137145.2	-2.691536435
IGFBP4	-2.814298814
GMPR	-2.844229071
CDCA7	-2.900356735
MPP3	-3.008968554
SLC46A1	-3.237111651
REPS2	-3.301234861
LGR4	-3.60237973
CYP2U1	-3.828562299
IQCD	-3.871745177
LINC00487	-3.902120701
CTTNBP2	-4.385524949
NOTUM	-5.392030776

## Sheet: 68-HIV-Old
Genes	Fold_change
L1TD1	6.39389
TSHR	5.84296
DTL	5.7853
GP6	5.08711
P2RY2	4.91984
DGKG	4.68476
OPN1SW	4.58004
STK36	4.17762
GPRC5A	4.00543
SLC35F2	3.67048
MT2A	3.49336
BX640514.1	3.14967
RNF144A	3.10386
LINC00536	3.04488
RGS17	2.98136
PDE4B	2.83448
SNAPC1	2.775
ATP6V0D2	2.72022
UXS1	2.41088
AC105177.1	2.40357
GCH1	2.39322
GADD45B	2.32305
LCP2	2.28065
TNFSF9	2.22964
PLCXD1	2.21641
SLAMF7	2.19406
MCTP1	2.1697
RSAD2	2.12759
C2CD2	2.0786
ANKRD1	2.0621
NRP2	2.05472
RIPK2	1.96789
SGPP2	1.94212
SNN	1.9404
CCDC85B	1.8994
MOAP1	1.83972
PHACTR1	1.79813
NBPF9	1.79576
DRAM1	1.789
CD48	1.68587
CD59	1.60155
UBTD2	1.58263
RPF2	1.55101
C15orf48	1.5347
GPR84	1.49042
SLCO2B1	1.48623
SEMA4A	1.46828
GZMB	1.44746
ST3GAL4	1.44661
LITAF	1.42568
SNX10	1.36799
CRADD	1.33933
TXN	1.32387
TMEM251	1.307
PCID2	1.29324
HSPA9	1.28918
SMS	1.23773
SLC20A1	1.23284
NPM1	1.21558
TRIP10	1.20999
CHAC2	-1.23466
STX6	-1.25105
MIGA2	-1.26454
ANKRD52	-1.66069
RNASE1	-1.67332
KAT14	-1.84084
NFATC3	-1.87136
TEP1	-4.15461
